# Supplementary material
Source: PubMed Central journal article supplement (PMC4357843)
Supplement: NIHMS668713-supplement-01.pdf [file NIHMS668713-supplement-01.pdf]

## Supplementary appendix

This appendix formed part of the original submission and has been peer reviewed. We post it as supplied by the authors.

Supplement to: Lima VD, Lourenço L, Yip B, Hogg RS, Phillips P, Montaner JSG. AIDS incidence and AIDS-related mortality in British Columbia, Canada, between 1981 and 2013: a retrospective study. *Lancet HIV* 2015; published online Feb 13. [http://dx.doi.org/10.1016/S2352-3018\(15\)00017-X](http://dx.doi.org/10.1016/S2352-3018(15)00017-X).

## Supplementary Material

### Negative Binomial Regression Analysis<sup>1,2</sup>

We run this model in the statistical software R<sup>©</sup> version 3.0.2 so that we could make use of the following packages: (1) AER to test for overdispersion and assess whether a Quasi-Poisson or a negative binomial would be the appropriated distribution for our count data; (2) psc1 and lmtest to test the likelihood ratios between the Negative Binomial and Poisson regressions; and (3) MASS to perform the negative binomial regression and obtain robust standard errors for our estimated parameters. Code used can be obtained from the first author in the paper.

1. We assessed whether the relationship between the mean and the variance was linear or quadratic by plotting the mean and the variance for the combined levels of the categorical variables age group and gender.

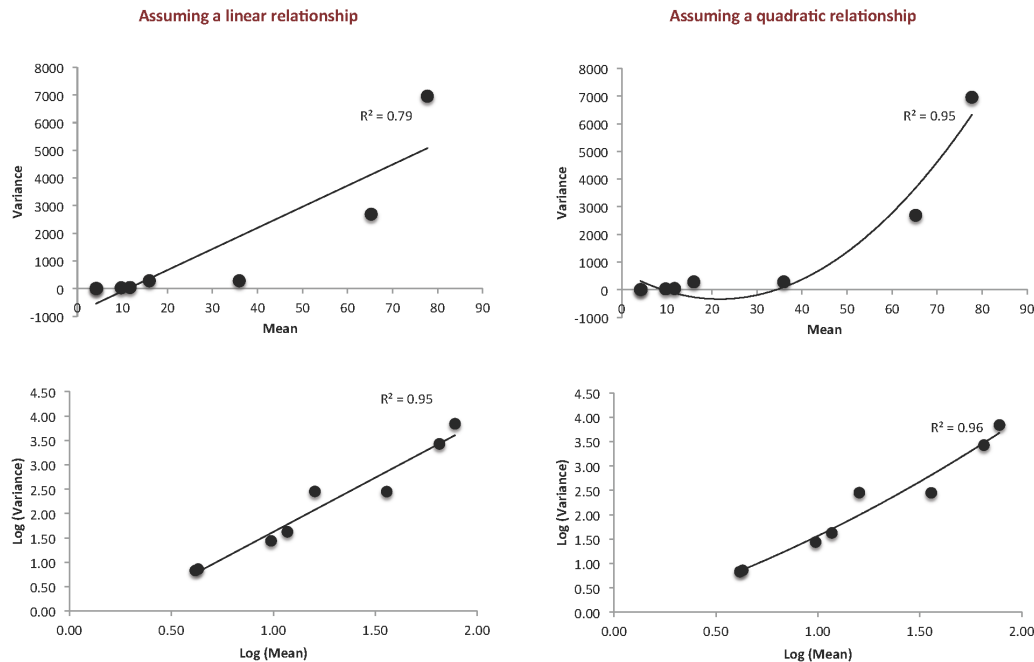

In summary, the relationship between the mean and the variance seems to be quadratic (based in the curves and the statistic  $R^2$  (larger values are indicative of better fit – maximum is at 1), however, with the small sample size for the models, it is hard to really know for sure.

2. The test of overdispersion in the Poisson model was done by comparing the mean to the variance of the counts and by fitting the

linear regression 
$$\frac{(y_i - \hat{\mu}_i)^2 - y_i}{\hat{\mu}_i} = \alpha \frac{g(\hat{\mu}_i)}{\hat{\mu}_i} + u_i$$
, where  $\hat{\mu}_i = \exp(x' \hat{\beta})$  and  $u_i$  is the error term. The function  $g(\cdot)$  could be

$g(\mu) = \mu$  or  $g(\mu) = \mu^2$ , and in our case we were interested in fitting a negative binomial with overdispersion of the form

$g(\mu) = \mu^2$ . Note that in this case we were testing the hypothesis:  $H_0 : \alpha = 0$  versus  $H_1 : \alpha \neq 0$ . In this case p-values  $> 0.05$  indicated the presence of overdispersion. This test was done using the R library AER function `dispersiontest()`. For overdispersion, we also examined the ratio between the model's residual deviance and the degrees of freedom and a model without overdispersion would have this ratio equal to one.

3. To assess the goodness of fit of each model, we used different criteria: (1) We compared the likelihood ratio test of the Negative Binomial in relation to the Poisson distribution using two likelihood-based tests (functions `lrtest()` from the `lmtest` R library and `odTest()` from the `pscl` R library). In these tests we compared the log-likelihoods of a negative binomial regression model and a Poisson regression model – in this case p-values  $< 0.05$  indicate that the Negative Binomial distribution provides a better fit to the data; (2) We examined the estimate and standard error (SE) for the dispersion parameter to assess its magnitude; and (3) We plotted the Pearson residuals by the model predicted values, and we also tested the significance of the sum of the Pearson

residuals. We used the chi-square test built into R – in this case p-values  $\geq 0.05$  indicated the appropriateness of the model in fitting the data.

Next, we present the tables with the diagnostic/test information, described in items 2 and 3 above, for each of the fitted models in Table 2 in the manuscript. For the calendar periods 1981-1996 and 2004-2013, we fitted a model with both age and gender as covariates. Based on the assumptions check for the models in periods 1997-1999 and 2000-2003, we had to fit separated models for gender and age to fulfill the requirements of fitting a Negative Binomial regression. We believe that the small sample size in these groups might have influenced the model's diagnostic statistics and tests.

| Diagnostic Statistics/Tests                                                                              | Period         | Period         |
|----------------------------------------------------------------------------------------------------------|----------------|----------------|
|                                                                                                          | 1981 -1996     | 2004 - 2013    |
| Mean of Outcome                                                                                          | 38.74          | 22.88          |
| Variance of Outcome                                                                                      | 4688.54        | 499.39         |
| <b>Model with age and gender as covariates</b>                                                           |                |                |
| <i>Overdispersion tests</i>                                                                              |                |                |
| Dispersion parameter - Negative Binomial                                                                 | 0.97 (SE 0.15) | 6.96 (SE 1.62) |
| Residual deviance - Poisson                                                                              | 2879.90        | 313.60         |
| Residual deviance - Negative Binomial                                                                    | 82.70          | 79.72          |
| Degrees of freedom                                                                                       | 72.00          | 72.00          |
| Deviance/degrees of freedom - Poisson                                                                    | 40.00          | 4.36           |
| Deviance/degrees of freedom - Negative Binomial                                                          | 1.15           | 1.11           |
| Hypothesis test for overdispersion (p-value)                                                             | 0.9456         | 0.1260         |
| <i>Goodness of fit tests</i>                                                                             |                |                |
| AIC Poisson                                                                                              | 3212.5         | 670.98         |
| AIC Negative Binomial                                                                                    | 624.42         | 534.26         |
| Hypothesis test for the appropriateness of the Negative Binomial versus a Poisson distribution (p-value) | 0.0000         | 0.0000         |
| Likelihood test comparing the Poisson and the Negative Binomial distributions (p-value)                  | 0.0000         | 0.0000         |
| Hypothesis test, based on residuals, for the model fit (p-value) - Poisson                               | 0.0000         | 0.0000         |
| Hypothesis test, based on residuals, for the model fit (p-value) - Negative Binomial                     | 0.9618         | 0.4173         |

| Diagnostic Statistics/Tests                                                                              | Period           | Period           |
|----------------------------------------------------------------------------------------------------------|------------------|------------------|
|                                                                                                          | 1997 - 1999      | 2000 - 2003      |
| Mean of Outcome                                                                                          | 27.71            | 24.09            |
| Variance of Outcome                                                                                      | 884.81           | 491.54           |
| <b>Model with age and gender as covariates</b>                                                           |                  |                  |
| <i>Overdispersion tests</i>                                                                              |                  |                  |
| Dispersion parameter - Negative Binomial                                                                 | 31.23 (SE 20.80) | 20.38 (SE 19.70) |
| Residual deviance - Poisson                                                                              | 61.57            | 53.49            |
| Residual deviance - Negative Binomial                                                                    | 37.01            | 35.37            |
| Degrees of freedom                                                                                       | 26.00            | 18.00            |
| Deviance/degrees of freedom - Poisson                                                                    | 2.37             | 2.97             |
| Deviance/degrees of freedom - Negative Binomial                                                          | 1.42             | 1.97             |
| Hypothesis test for overdispersion (p-value)                                                             | 0.0245           | 0.0129           |
| <i>Goodness of fit tests</i>                                                                             |                  |                  |
| AIC Poisson                                                                                              | 210.92           | 167.76           |
| AIC Negative Binomial                                                                                    | 204.89           | 167.12           |
| Hypothesis test for the appropriateness of the Negative Binomial versus a Poisson distribution (p-value) | 0.0023           | 0.0519           |
| Likelihood test comparing the Poisson and the Negative Binomial distributions (p-value)                  | 0.0046           | 0.1038           |
| Hypothesis test, based on residuals, for the model fit (p-value) - Poisson                               | 0.0000           | 0.0000           |
| Hypothesis test, based on residuals, for the model fit (p-value) - Negative Binomial                     | 0.0768           | 0.0048           |
| <b>Model with only gender as a covariate</b>                                                             |                  |                  |
| <i>Overdispersion tests</i>                                                                              |                  |                  |
| Dispersion parameter - Negative Binomial                                                                 | 2.27 (SE 0.65)   | 1.23 (SE 0.31)   |
| Residual deviance - Poisson                                                                              | 358.83           | 593.61           |
| Residual deviance - Negative Binomial                                                                    | 32.79            | 34.07            |
| Degrees of freedom                                                                                       | 29.00            | 27.00            |
| Deviance/degrees of freedom - Poisson                                                                    | 12.37            | 21.99            |
| Deviance/degrees of freedom - Negative Binomial                                                          | 2.65             | 1.55             |
| Hypothesis test for overdispersion (p-value)                                                             | 0.0000           | 0.0000           |
| <i>Goodness of fit tests</i>                                                                             |                  |                  |
| AIC Poisson                                                                                              | 502.18           | 740.96           |
| AIC Negative Binomial                                                                                    | 244.34           | 267.18           |
| Hypothesis test for the appropriateness of the Negative Binomial versus a Poisson distribution (p-value) | 0.0000           | 0.0000           |
| Likelihood test comparing the Poisson and the Negative Binomial distributions (p-value)                  | 0.0000           | 0.0000           |
| Hypothesis test, based on residuals, for the model fit (p-value) - Poisson                               | 0.0000           | 0.0000           |
| Hypothesis test, based on residuals, for the model fit (p-value) - Negative Binomial                     | 0.3200           | 0.7685           |
| <b>Model with only age as a covariate</b>                                                                |                  |                  |
| <i>Overdispersion tests</i>                                                                              |                  |                  |
| Dispersion parameter - Negative Binomial                                                                 | 2.73 (SE 0.92)   | 1.80 (SE 0.55)   |
| Residual deviance - Poisson                                                                              | 195.28           | 298.70           |
| Residual deviance - Negative Binomial                                                                    | 23.86            | 24.26            |
| Degrees of freedom                                                                                       | 21.00            | 19.00            |
| Deviance/degrees of freedom - Poisson                                                                    | 9.30             | 15.72            |
| Deviance/degrees of freedom - Negative Binomial                                                          | 2.57             | 1.54             |
| Hypothesis test for overdispersion (p-value)                                                             | 0.0000           | 0.0000           |
| <i>Goodness of fit tests</i>                                                                             |                  |                  |
| AIC Poisson                                                                                              | 303.55           | 410.96           |
| AIC Negative Binomial                                                                                    | 179.5            | 192.48           |
| Hypothesis test for the appropriateness of the Negative Binomial versus a Poisson distribution (p-value) | 0.0000           | 0.0000           |
| Likelihood test comparing the Poisson and the Negative Binomial distributions (p-value)                  | 0.0000           | 0.0000           |
| Hypothesis test, based on residuals, for the model fit (p-value) - Poisson                               | 0.0000           | 0.0000           |
| Hypothesis test, based on residuals, for the model fit (p-value) - Negative Binomial                     | 0.7633           | 0.6967           |

## Generalized Additive Models<sup>3,4</sup>

We run this model in the statistical software R© version 3.0.2 so that we could make use of the following packages: (1) mgcv, function gam (), for fitting the generalized additive model and test the models' goodness of fit through diagnostic plots commonly using when fitting a generalized liner model; and (2) function anova() to perform an analysis of deviance comparing each of the fitted models for each outcome.

In brief, we used a cubic regression spline to smooth the trend of the number of ADIs and the proportion of deaths due to an ADI by calendar year. In this case calendar year is the explanatory variable being smoothed. It is important to mention that we decided to transform the outcome number of ADIs using the logarithm function to obtain a better fit for the model and we assumed a Gaussian distribution for this outcome. For the outcome proportion of deaths due to an ADI, we modeled it using the number of deaths due to an ADI as outcome and as an offset the overall number of deaths for each calendar year. In this case we also transformed the outcome using the logarithm function and assumed a Gaussian distribution.

Additionally, different models were fitted based on the number of knots used to smooth the trend in both outcomes when estimation was via restricted maximum likelihood. We also used a built-in smoothing parameter estimation method "GCV.Cp" to estimate the number of knots in each of the models. To assess the goodness of fit of each model, R outputs the adjusted  $R^2$ , the percentage of the deviance explained, the generalized cross validation (GCV) score (lower values produce better fitted models), and a test to check the appropriateness of the number of knots in the model.

Next, we present the table with the diagnostic statistics for the final model of each outcome as outlined above.

| Coefficients/Diagnostic Statistics                      | Number of ADIs | Proportion of deaths due to an ADI |
|---------------------------------------------------------|----------------|------------------------------------|
| <b>Model Parameters</b>                                 |                |                                    |
| Significance of spline term for calendar year (p-value) | 0.0000         | 0.0000                             |
| <b>Goodness of fit statistics</b>                       |                |                                    |
| $R^2$                                                   | 0.9910         | 0.9730                             |
| Deviance explained                                      | 99.40%         | 98.10%                             |
| Generalized cross validation (GCV) score                | 0.0333         | 0.0019                             |
| Sum of squared Pearson residuals                        | 0.0000         | 0.0000                             |

The diagnostic plots for each of the models are presented next. In summary, these plots indicate that we obtained an excellent fit for each of our outcomes.

# Model Diagnosis Plots for the Number of ADIs

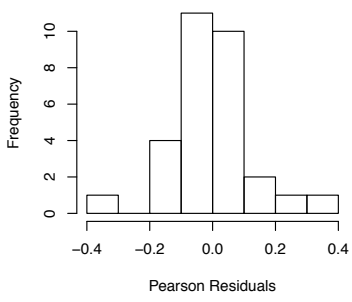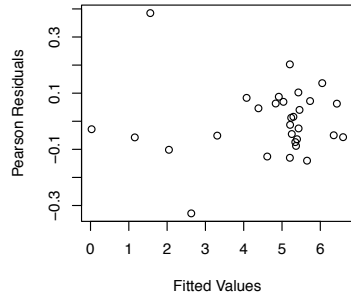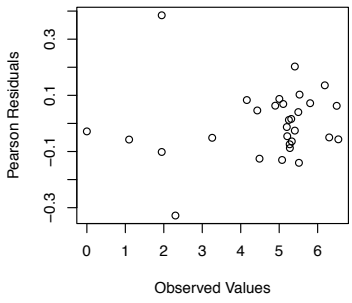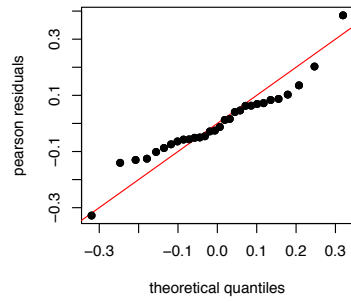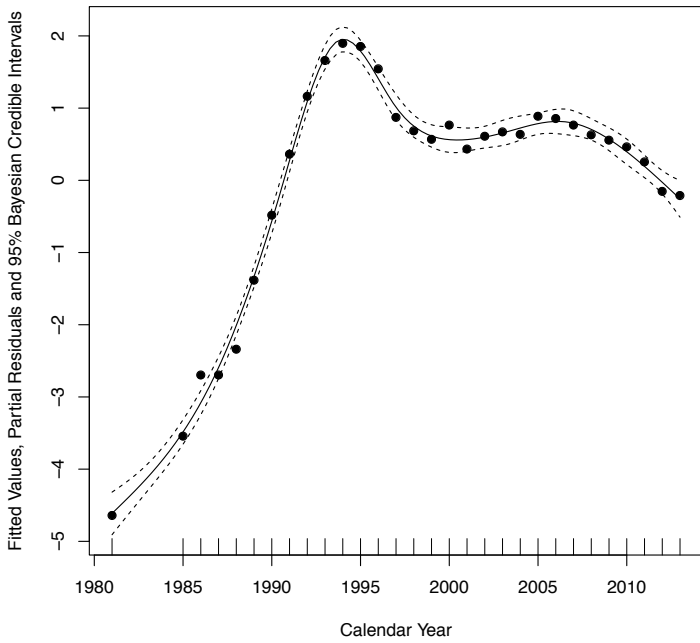

# Model Diagnosis for the Proportion of Deaths due to an ADI

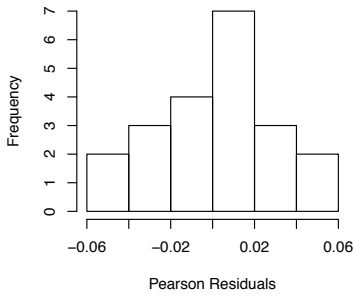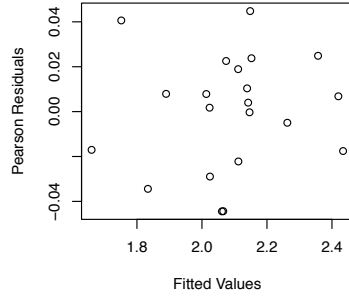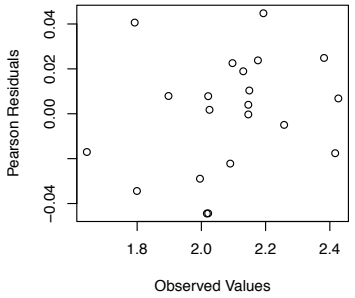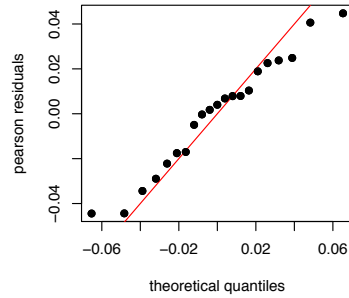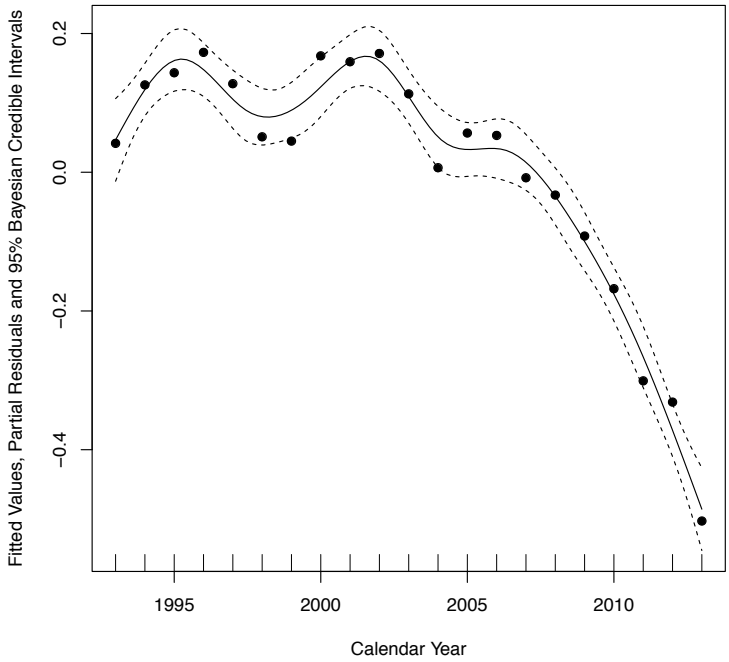

## References

1. Cameron AC, Trivedi PK. Regression analysis of count data. UK: Cambridge University Press; 1998.
2. Cameron AC, Trivedi PK. Microeconometrics: Methods and Applications. UK: Cambridge University Press; 2005.
3. Clark M. Generalized Additive Models: Getting Started with Additive Models in R 2013. Available from: <http://www3.nd.edu/~mclark19/learn/GAMS.pdf>.
4. Wood SN. Generalized Additive Models. An Introduction with R. US: Chapman & Hall/CRC; 2006.



|       | 1981 | 1982 | 1983 | 1984 | 1985 | 1986 | 1987 | 1988 | 1989 | 1990 | 1991 | 1992 | 1993 | 1994 | 1995 | 1996 | 1997 |
|-------|------|------|------|------|------|------|------|------|------|------|------|------|------|------|------|------|------|
| All   | 2    | 0    | 0    | 0    | 3    | 7    | 7    | 10   | 26   | 64   | 150  | 334  | 547  | 696  | 665  | 491  | 253  |
| Men   | 0    | 0    | 0    | 0    | 3    | 7    | 6    | 9    | 25   | 60   | 146  | 315  | 518  | 659  | 616  | 441  | 215  |
| Women | 1    | 0    | 0    | 0    | 0    | 0    | 1    | 1    | 1    | 4    | 3    | 17   | 27   | 32   | 46   | 45   | 33   |
| <30   | 1    | 0    | 0    | 0    | 2    | 6    | 2    | 6    | 4    | 17   | 26   | 61   | 55   | 62   | 66   | 45   | 25   |
| 30–39 | 0    | 0    | 0    | 0    | 1    | 0    | 3    | 3    | 14   | 37   | 80   | 164  | 257  | 365  | 299  | 247  | 135  |
| 40–49 | 0    | 0    | 0    | 0    | 0    | 1    | 0    | 1    | 8    | 10   | 35   | 89   | 187  | 192  | 218  | 132  | 59   |
| ≥50   | 0    | 0    | 0    | 0    | 0    | 0    | 2    | 0    | 0    | 0    | 8    | 18   | 46   | 72   | 79   | 62   | 29   |

  

|       | 1998 | 1999 | 2000 | 2001 | 2002 | 2003 | 2004 | 2005 | 2006 | 2007 | 2008 | 2009 | 2010 | 2011 | 2012 | 2013 | Total |
|-------|------|------|------|------|------|------|------|------|------|------|------|------|------|------|------|------|-------|
| All   | 207  | 187  | 225  | 163  | 192  | 203  | 197  | 252  | 244  | 223  | 197  | 183  | 167  | 136  | 90   | 84   | 6205  |
| Men   | 181  | 160  | 199  | 131  | 159  | 174  | 169  | 197  | 201  | 190  | 150  | 143  | 126  | 108  | 73   | 62   | 5443  |
| Women | 25   | 23   | 23   | 29   | 32   | 29   | 27   | 55   | 43   | 33   | 45   | 37   | 39   | 26   | 16   | 22   | 715   |
| <30   | 20   | 13   | 16   | 15   | 14   | 12   | 14   | 13   | 22   | 7    | 14   | 14   | 10   | 12   | 3    | 2    | 579   |
| 30–39 | 80   | 82   | 94   | 69   | 68   | 83   | 58   | 84   | 66   | 56   | 50   | 42   | 40   | 31   | 9    | 18   | 2535  |
| 40–49 | 83   | 63   | 69   | 43   | 69   | 56   | 89   | 96   | 102  | 112  | 81   | 74   | 59   | 54   | 41   | 29   | 2052  |
| ≥50   | 23   | 25   | 44   | 33   | 40   | 52   | 35   | 59   | 54   | 48   | 50   | 51   | 56   | 37   | 36   | 35   | 994   |

**Table: Number of ADIs each year**

Data on sex and age group not available for all ADIs. ADI=AIDS-defining illness.

|                    | 1981 | 1982 | 1983 | 1984 | 1985 | 1986 | 1987 | 1988 | 1989 | 1990 | 1991 | 1992 | 1993 | 1994 | 1995 | 1996 | 1997 |
|--------------------|------|------|------|------|------|------|------|------|------|------|------|------|------|------|------|------|------|
| Not caused by AIDS | 0    | 0    | 0    | 0    | 0    | 0    | 10   | 39   | 65   | 119  | 147  | 173  | 75   | 44   | 31   | 11   | 20   |
| Caused by AIDS     | 0    | 0    | 0    | 0    | 0    | 0    | 0    | 0    | 0    | 0    | 0    | 1    | 181  | 267  | 261  | 241  | 125  |
| % caused by AIDS   |      |      |      |      |      |      |      |      |      |      |      | 1%   | 71%  | 86%  | 89%  | 96%  | 86%  |

  

|                    | 1998 | 1999 | 2000 | 2001 | 2002 | 2003 | 2004 | 2005 | 2006 | 2007 | 2008 | 2009 | 2010 | 2011 | 2012 | 2013 | Total |
|--------------------|------|------|------|------|------|------|------|------|------|------|------|------|------|------|------|------|-------|
| Not caused by AIDS | 38   | 42   | 9    | 11   | 7    | 28   | 56   | 55   | 51   | 72   | 72   | 97   | 102  | 133  | 145  | 174  | 1826  |
| Caused by AIDS     | 99   | 104  | 156  | 140  | 141  | 140  | 105  | 150  | 135  | 123  | 106  | 105  | 79   | 63   | 62   | 44   | 2828  |
| % caused by AIDS   | 72%  | 71%  | 95%  | 93%  | 95%  | 83%  | 65%  | 73%  | 73%  | 63%  | 60%  | 52%  | 44%  | 32%  | 30%  | 20%  |       |

**Table: Number and proportion of deaths caused by AIDS**
